# Supplementary material for: Can Chaotic Analysis of Electroencephalogram Aid the Diagnosis of Encephalopathy?
Source: Hindawi journal article supplement (doi:10.1155/2018/8192820), 2018-05-29
Supplement: f1 [file 8192820.f1.pdf]

SUPPLEMENTARY FILES

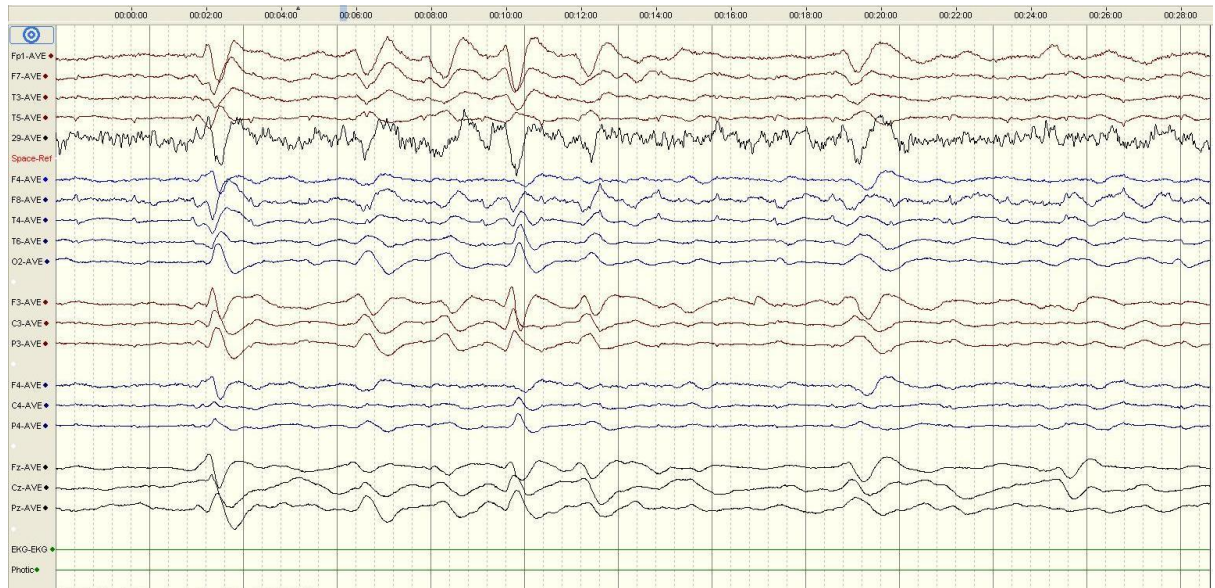

Figure S1: EEG epoch of encephalopathic patient with triphasic waves

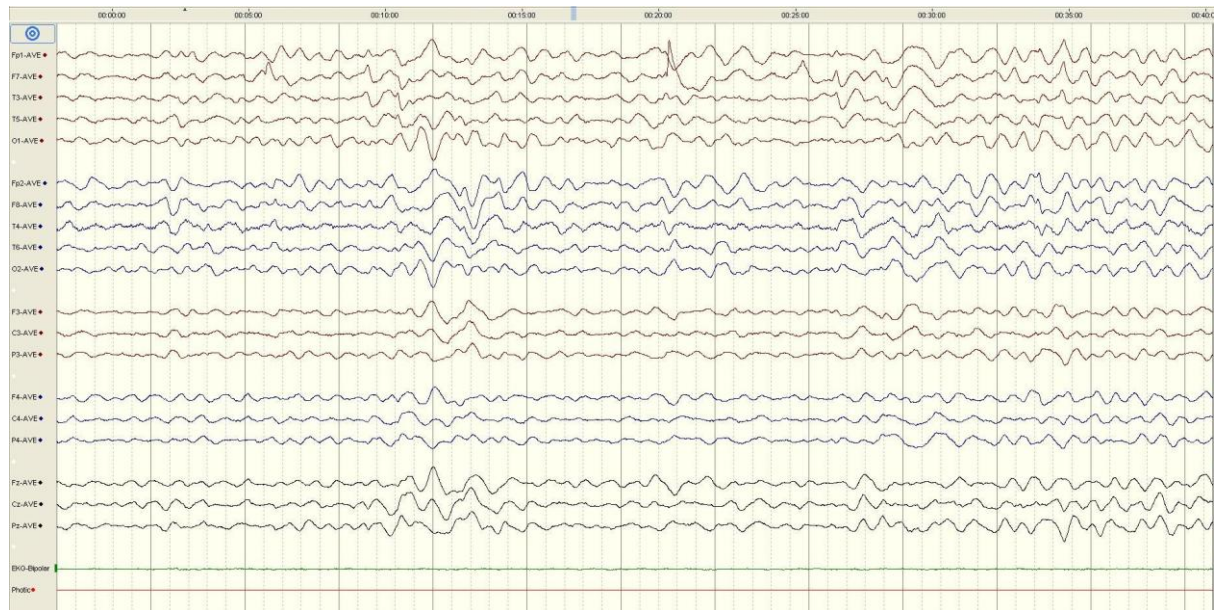

Figure S2: EEG sample showing EEG of encephalopathic patients with marked slowing of EEG

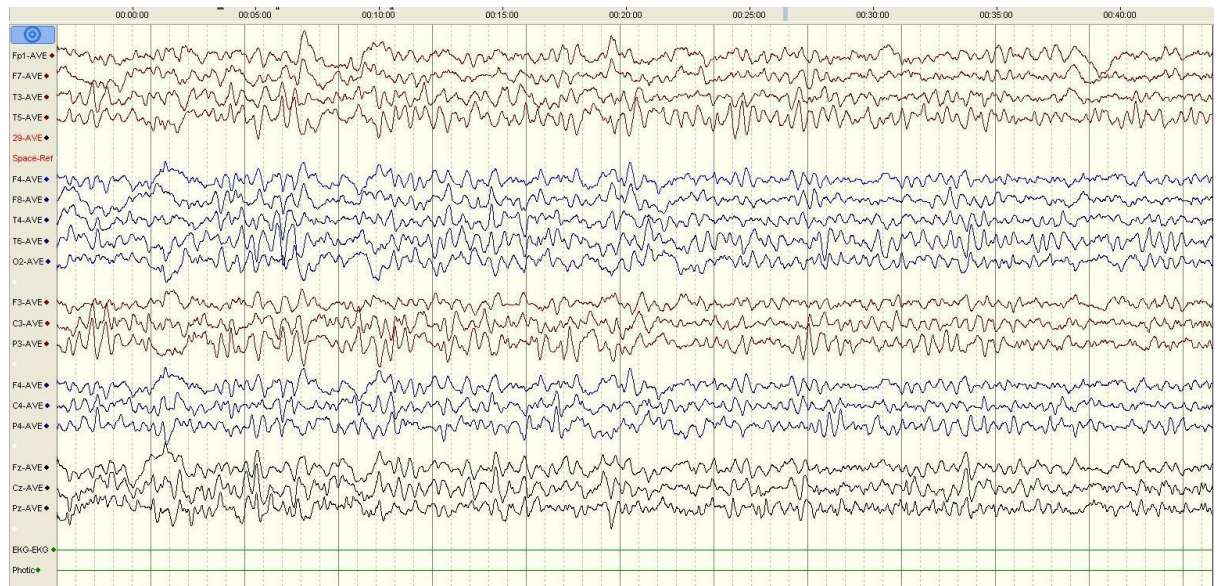

Figure S3: Normal EEG
